# Supplementary material
Source: publisher site journal article supplement (https://www.dovepress.com/article/588708)
Supplement: Supplementary file 1 [file 588708_Appendix%201%20and%202.docx]

**Appendix 1. Data Collection Instrument**

**Instructions for Coding:**

1. All selected codes require supported text. Keep the copied text short, only need first few words and last few words. Please use the following format, *(Systems Approach, “here’s the text that supports this” - any notes / explanations)*
2. Mark if entry needs further discussion with your co-coder
3. Flow: We recommend keeping this form up as you code each response for ease of access
4. Codes listed here.

**Your Name:**

**Participant ID (Ex: A-1):**

**What kind of intervention are they implementing?**

- Clinical (provider-level) intervention
- Policy (larger than organizational level) intervention (e.g., locality or state)
- Policy (organizational-level) intervention (e.g., hospital policy)
- Community-level intervention

**Select all “Personal” Clinical Scholars Competencies expressed in this response:**

- Emotional Intelligence
- Self-Awareness
- Social Justice
- Other/ new Code
- Supporting quotes (required)

**Select all “Interpersonal Leadership” CS Competencies expressed in this response:**

- Communication
- Conflict Management
- Innovation Orientation
- Negotiation
- Practice Multiculturalism
- Visioning
- Other/ new code
- Supporting quotes (required)

**Select all “Organizational Leadership” CS Competencies expressed in this response:**

- Organizational Capacity for Health Equity
- Organizational Culture
- Diversity and Inclusion
- Implementation Science
- Change Leadership
- Systems Thinking
- Political Thinking
- Other / new code
- Supporting quotes (required)

**Select all “Community and Systems Leadership” CS competencies expressed in this response:**

- Advocacy
- Collaboration and Partnerships
- Futuring
- Health Equity
- Meaningful Community Engagement
- Social Determinants of Health
- Stakeholder Analysis
- Other / new code
- Supporting quotes (required)

**Room for more supporting quotes & notes here:**

**Mark if some codes need additional discussion with co-coder:** Yes/No

**Appendix 2. Codebook and definitions by domain**

**Source: Brandert K, Corbie-Smith G, Berthiaume R, Green M, Fernandez CS. Clinical scholars: making equity, diversity and inclusion learning an integral part of leadership development. InLeading Community Based Changes in the Culture of Health in the US-Experiences in Developing the Team and Impacting the Community 2021 Sep 8. IntechOpen.**

| **Personal** | |
| --- | --- |
| **Emotional Intelligence** | **Ability to assess and understand the emotions of one’s self, others and groups; the ability to relate to others beyond technical concerns; the ability to implement soft skills in interpersonal or organizational settings and manage stress** |
| **Self-Awareness** | **Assessing and understanding your personal leadership strengths and development areas (weaknesses); being aware of how personal preferences and leadership style differ from others; understanding what you still need to learn; the ability to “own” mistakes; use self-examination and reflection to create a life-long leadership learning plan** |
| **Social Justice** | **Develop the knowledge, skills, and disposition needed to create environments that foster equitable participation and self-determination of all groups while seeking to address and acknowledge issues of oppression, privilege, and power** |
| **Interpersonal** | |
| **Communication** | **Effectively communicate with individuals and groups representing diverse stakeholders both within and without the organization; speak in a clear and concise manner in both routine and high tension situations, with individuals, groups, and the press.** |
| **Innovation** | **Implement interpersonal strategies to promote the generation of new ideas, approaches, and processes; engage in innovation and entrepreneurship at a personal level in addressing wicked problems that impede achieving a culture of health.** |
| **Negotiation** | **Engage in productive dialog to resolve disputes between either people or organizations; represent/defend the interests of your organization/self when crafting agreements with other parties while creating new opportunities for partnerships and collaboration.** |
| **Practicing Multiculturalism** | **Articulate and readily integrate into their work the concepts of identity, culture, equity, diversity and inclusion; examine and build respect and appreciation for individual differences (e.g., personality, learning styles, and life experiences) and group/social differences (e.g., race/ ethnicity, class, gender, sexual orientation, country of origin, and ability as well as cultural, political, religious, or other affiliations) that can be engaged in the service of learning and working together** |
| **Visioning** | **Create a compelling, engaging vision that embraces a holistic perspective of a chosen concept; integrate the vision with the mission of the larger organization; inspire others to work towards achieving that vision as well** |
| **Organizational** | |
| **Change Management** | **Develop measures of performance improvements; develop and/ or implement performance standards which foster accountability and facilitate innovation; link performance measures and standards to a potential strategic plan/innovation plan for the organization; implement systems to promote innovation at the team or organizational level** |
| **Diversity and Inclusion** | **Foster cultures that support diversity and inclusion; employ language and behaviors that acknowledge that a community or institution’s success is dependent on how well it values, engages and includes the rich diversity of its members or constituent** |
| **Implementation Science** | **Identify and utilize factors and methods to examine the process of implementation to effectively operationalize proven interventions and produce positive outcomes** |
| **Organization Capacity for HE** | **Understand and develop techniques, approaches and strategies to advocate for transformation of systemic power structures and policies such that shared power arrangements, increased community access and engagement, and equitable outcomes result** |
| **Organizational Culture** | **Create an organizational culture that embraces varying skills and perspectives to capitalize on the contributions of various members; impact the organizational culture of groups such that members are engaged and mission-focused; create a work environment where group member satisfaction is high and people feel valued, engaged, and utilized to their full potential** |
| **Systems Thinking** | **Identify systems influences of wicked problems in planning solutions; implement systems theories to address organizational change and transformation; build organizational capacity to envision and select system-wide strategies to address acute problems** |
| **Political Thinking** | **Developing and implementing political strategies both within the organization and externally.** |
| **Community & Systems** | |
| **Advocacy** | **Influence groups, policy, public policy, and resource allocation decisions within political, economic and social systems and institutions; create persuasive dialog to support one’s issue or goal.** |
| **Collaboration and Partnerships** | **Recognize and reconcile emotional and rational elements in collaboration building and strategic planning; create opportunities for individual, team, and organizational success through the development of creative partnerships internal to and external to the organization; link partnership development with community impact, positive revenue streams and sustainability** |
| **Futuring** | **Assess current trends for potential future developments in programs, concerns, political agendas, or concepts that are aimed at building a culture of health; contribute to creating the relevant systems of the future through technology, innovation, partnerships, and political influence.** |
| **Health Equity** | **Pursue the highest possible standard of health for all people, with special attention to the needs of those at greatest risk of poor health, based on social conditions; champion and advocate for interventions or policies that advance the opportunity for all to attain their highest level of health** |
| **Meaningful Community Engagement** | **Employ the four specific elements of authentic community engagement - 1) Guiding Principles of Partnership, 2) Quality Processes, 3) Meaningful Outcomes and 4) Transformative Experience(s) while working collaboratively with and through groups to address issues affecting the well-being of those people to build trust, enlist new resources and allies, create better communication, and improve overall health outcome** |
| **Social Determinants of Health** | **Understand how the social determinants of health impact both individuals and communities; integrate intervention strategies and policies to address social determinants of health into approaches of the Wicked Problem Impact Project** |
| **Stakeholder Analysis** | **Assess and analyze important players/factors that contribute to or impede individual, team, or organizational success; develop and implement strategies to align stakeholders to organizational mission and vision** |
